# Supplementary material for: Survival and Growth of Yeast without Telomere Capping by Cdc13 in the Absence of Sgs1, Exo1, and Rad9
Source: PubMed Central journal article supplement (PMC2924318; doi:10.1371/journal.pgen.1001072), 2010-08-19
Supplement: pgen.1001072.s006.pdf [file pgen.1001072.s006.pdf]

# Figure S6

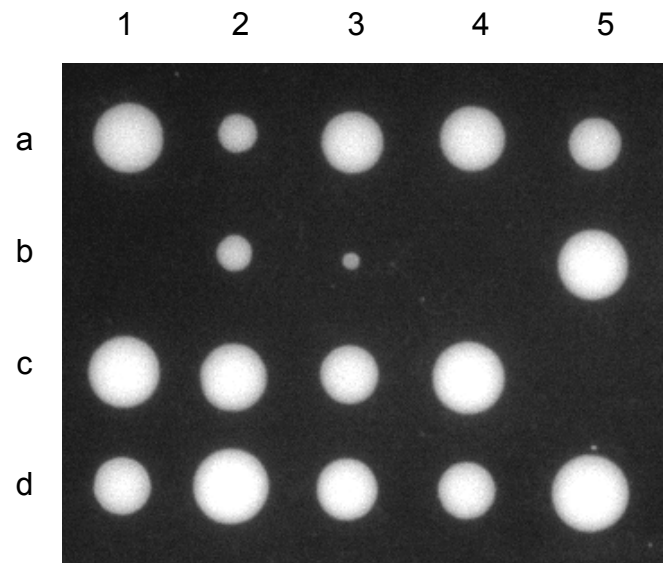

|   | 1             | 2       | 3          | 4          | 5               |
|---|---------------|---------|------------|------------|-----------------|
| a | 13,e1,9       | s1,e1,9 | e1,9       | e1         | 13,s1           |
| b | (s1, e1,9,s2) | e1, s1  | 13,s1,9,s2 | (s1,e1,s2) | e1              |
| c | s2            | 13,s2   | 13,s1      | 13,9,s2    | (13,9,s1,e1,s2) |
| d | 13,s1         | 13,9,s2 | e1,s2      | 13,s1,9    | 9,s2            |
