# Supplementary material for: Survival and Growth of Yeast without Telomere Capping by Cdc13 in the Absence of Sgs1, Exo1, and Rad9
Source: PubMed Central journal article supplement (PMC2924318; doi:10.1371/journal.pgen.1001072), 2010-08-19
Supplement: pgen.1001072.s010.pdf [file pgen.1001072.s010.pdf]

# Figure S10

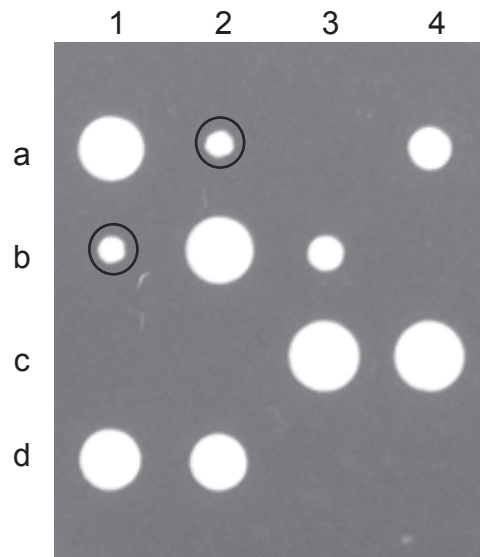

○ *cdc13Δ rad9Δ sgs1Δ exo1Δ*

|   | 1          | 2          | 3       | 4    |
|---|------------|------------|---------|------|
| a | e1         | s1,e1,9,13 | (13)    | s1,9 |
| b | s1,e1,9,13 | e1         | s1,e1,9 | (13) |
| c | (13)       | (13)       | WT      | e1,9 |
| d | s1,9       | s1,9       | (13)    | (13) |
