# Supplementary material for: Survival and Growth of Yeast without Telomere Capping by Cdc13 in the Absence of Sgs1, Exo1, and Rad9
Source: PubMed Central journal article supplement (PMC2924318; doi:10.1371/journal.pgen.1001072), 2010-08-19

# Figure S11

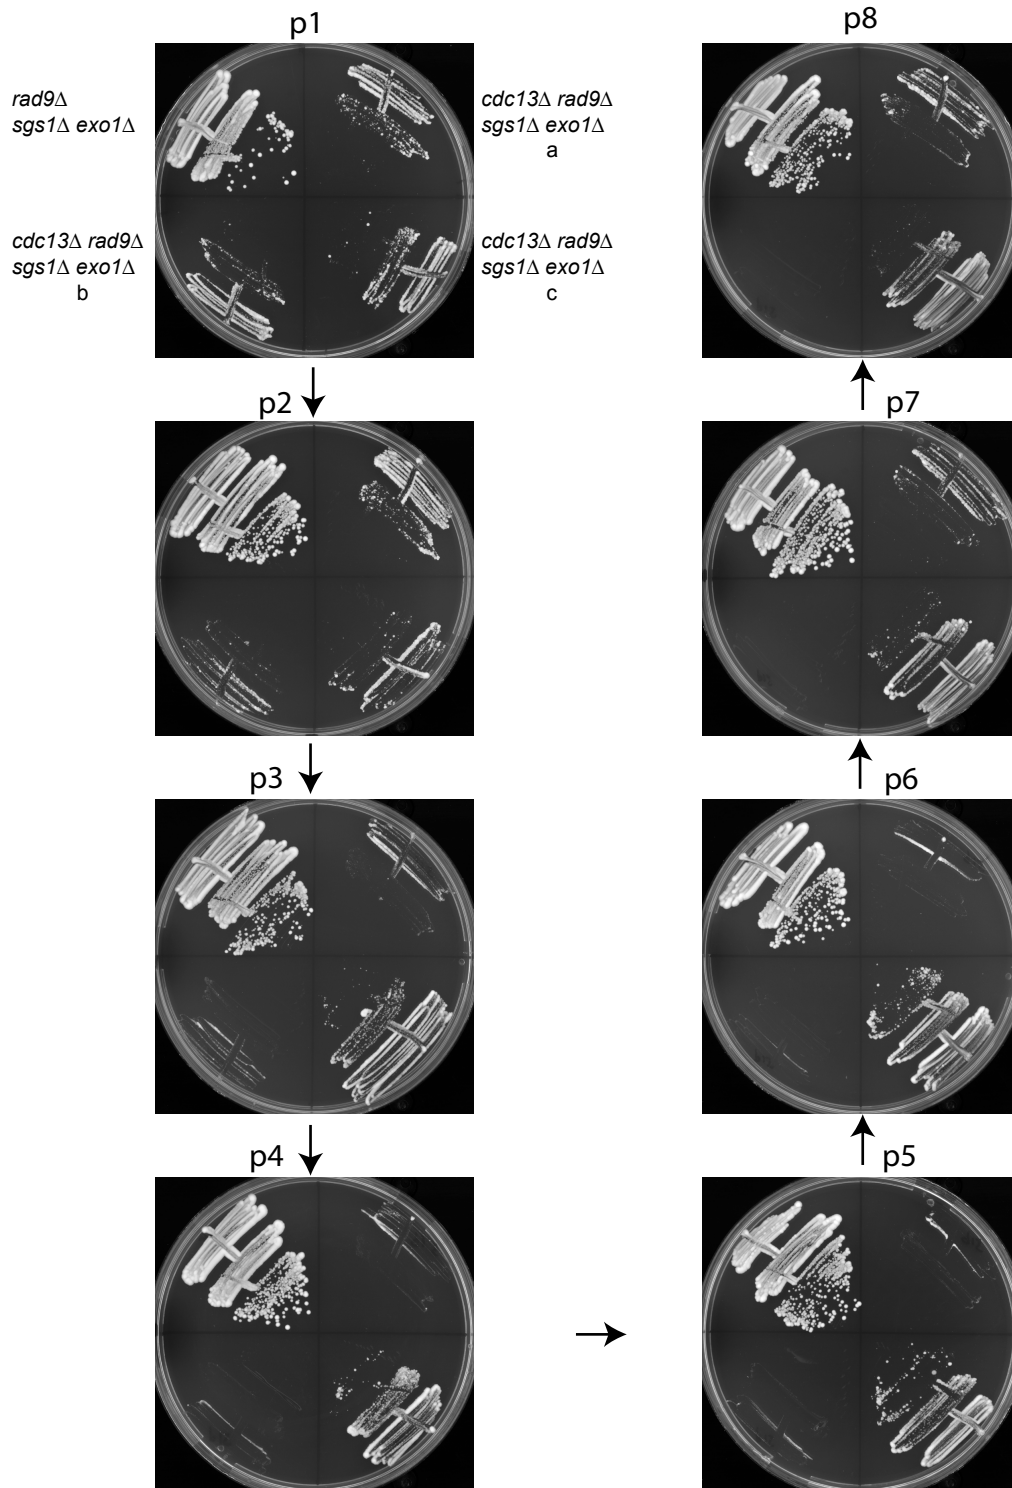

Supplement: pgen.1001072.s011.pdf [file pgen.1001072.s011.pdf]
