# Supplementary material for: Survival and Growth of Yeast without Telomere Capping by Cdc13 in the Absence of Sgs1, Exo1, and Rad9
Source: PubMed Central journal article supplement (PMC2924318; doi:10.1371/journal.pgen.1001072), 2010-08-19
Supplement: pgen.1001072.s013.pdf [file pgen.1001072.s013.pdf]

Table S1 Ratio of *cdc13Δ/CDC13* spores in *rad9Δ sgs1Δ exo1Δ* background

|                    | Viable spores examined | Number of <i>CDC13 sgs1Δ exo1Δ rad9Δ</i> spores observed | Number of <i>cdc13Δ sgs1Δ exo1Δ rad9Δ</i> spores observed | Ratio of <i>cdc13Δ/CDC13</i> |
|--------------------|------------------------|----------------------------------------------------------|-----------------------------------------------------------|------------------------------|
| Tetrad dissection  | 325                    | 38<br>(expected=38.5)                                    | 29<br>(expected=38.5)                                     | 0.76                         |
| Random sporulation | 400                    | 46<br>(expected=44.4)                                    | 47<br>(expected=44.4)                                     | 1.02                         |
