# Supplementary material for: Survival and Growth of Yeast without Telomere Capping by Cdc13 in the Absence of Sgs1, Exo1, and Rad9
Source: PubMed Central journal article supplement (PMC2924318; doi:10.1371/journal.pgen.1001072), 2010-08-19
Supplement: pgen.1001072.s014.pdf [file pgen.1001072.s014.pdf]

Table S2 Yeast strains

| Strain       | Genotype                                                                                                                                                                                                                                  | Figures                 |
|--------------|-------------------------------------------------------------------------------------------------------------------------------------------------------------------------------------------------------------------------------------------|-------------------------|
| DLY640       | <i>MATa ade2-1 trp1-1 can1-100 leu2-3,112 his3-11,15 ura3 GAL+ psi+ ssd1-d2 RAD5</i>                                                                                                                                                      | 1C,1D,4B,5B,S1,S2       |
| DLY4557      | <i>MATa cdc13-1int ade2-1 trp1-1 can1-100 leu2-3,112 his3-11,15 ura3 GAL+ psi+ ssd1-d2 RAD5</i>                                                                                                                                           | 1A,4A,S2,S4             |
| DLY4719      | <i>MATa cdc13-1int ade2-1 trp1-1 can1-100 leu2-3,112 his3-11,15 ura3 GAL+ psi+ ssd1-d2 RAD5 sgs1Δ::KanMX</i>                                                                                                                              | 1A                      |
| DLY4921      | <i>MATa cdc13-1int ade2-1 trp1-1 can1-100 leu2-3,112 his3-11,15 ura3 GAL+ psi+ ssd1-d2 RAD5 exo1::LEU2</i>                                                                                                                                | 1A                      |
| DLY4910      | <i>MATa cdc13-1int ade2-1 trp1-1 can1-100 leu2-3,112 his3-11,15 ura3 GAL+ psi+ ssd1-d2 RAD5 sgs1Δ::KanMX exo1Δ::LEU2</i>                                                                                                                  | 1A                      |
| DLY4647      | <i>MATa cdc13-1int ade2-1 trp1-1 can1-100 leu2-3,112 his3-11,15 ura3 GAL+ psi+ ssd1-d2 RAD5 rad9Δ::HIS3</i>                                                                                                                               | 1A                      |
| DLY4720      | <i>MATa cdc13-1int ade2-1 trp1-1 can1-100 leu2-3,112 his3-11,15 ura3 GAL+ psi+ ssd1-d2 RAD5 rad9Δ::HIS3 sgs1Δ::KanMX</i>                                                                                                                  | 1A                      |
| DLY4922      | <i>MATa cdc13-1int ade2-1 trp1-1 can1-100 leu2-3,112 his3-11,15 ura3 GAL+ psi+ ssd1-d2 RAD5 rad9Δ::HIS3 exo1Δ::LEU2</i>                                                                                                                   | 1A                      |
| DLY4912-4914 | <i>MATa/α cdc13-1int ade2-1 trp1-1 can1-100 leu2-3,112 his3-11,15 ura3 GAL+ psi+ ssd1-d2 RAD5 rad9Δ::HIS3 sgs1::KanMX exo1Δ::LEU2</i>                                                                                                     | 1A,1C,1D,4A,4B,S2,S3,S4 |
| DLY5275-5280 | <i>MATa/α cdc13-1int ade2-1 trp1-1 can1-100 leu2-3,112 his3-11,15 ura3 GAL+ psi+ ssd1-d2 RAD5 rad9Δ::HIS3 sgs1::KanMX exo1Δ::LEU2</i>                                                                                                     | S3                      |
| DLY4918      | <i>MATa ade2-1 trp1-1 can1-100 leu2-3,112 his3-11,15 ura3 GAL+ psi+ ssd1-d2 RAD5 rad9Δ::HIS3 sgs1::KanMX exo1Δ::LEU2</i>                                                                                                                  | 1D,4A,S1,S2,S4,S12      |
| DLY3926      | <i>MATa cdc13-1int ade2-1 trp1-1 can1-100 leu2-3,112 his3-11,15 ura3 GAL+ psi+ ssd1-d2 RAD5 pDL17</i>                                                                                                                                     | S3                      |
| DLY1628      | <i>MATa ade2-1 trp1-1 can1-100 leu2-3,112 his3-11,15 ura3 GAL+ psi+ ssd1-d2 RAD5 tlc1Δ::HIS3 p::URA3::TLC1</i>                                                                                                                            | 4                       |
| DLY5260/5261 | <i>MATa cdc13-1int ade2-1 trp1-1 can1-100 leu2-3,112 his3-11,15 ura3 GAL+ psi+ ssd1-d2 RAD5 cdc15-2 bar1</i>                                                                                                                              | 2,3,S7,S8,S9            |
| DLY5123/5262 | <i>MATa cdc13-1int ade2-1 trp1-1 can1-100 leu2-3,112 his3-11,15 ura3 GAL+ psi+ ssd1-d2 RAD5 cdc15-2 bar1 sgs1Δ::KanMX</i>                                                                                                                 | 2,3,S7,S8,S9            |
| DLY5263/5264 | <i>MATa cdc13-1int ade2-1 trp1-1 can1-100 leu2-3,112 his3-11,15 ura3 GAL+ psi+ ssd1-d2 RAD5 cdc15-2 bar1 rad9Δ::HIS3</i>                                                                                                                  | 2,3,S7,S8,S9            |
| DLY5265/5266 | <i>MATa cdc13-1int ade2-1 trp1-1 can1-100 leu2-3,112 his3-11,15 ura3 GAL+ psi+ ssd1-d2 RAD5 cdc15-2 bar1 exo1Δ::LEU2</i>                                                                                                                  | 2,3,S7,S8,S9            |
| DLY5269/5270 | <i>MATa cdc13-1int ade2-1 trp1-1 can1-100 leu2-3,112 his3-11,15 ura3 GAL+ psi+ ssd1-d2 RAD5 cdc15-2 bar1 sgs1Δ::KanMX exo1Δ::LEU2</i>                                                                                                     | 2,3,S7,S8,S9            |
| DLY5267/5268 | <i>MATa cdc13-1int ade2-1 trp1-1 can1-100 leu2-3,112 his3-11,15 ura3 GAL+ psi+ ssd1-d2 RAD5 cdc15-2 bar1 rad9Δ::HIS3 sgs1Δ::KanMX</i>                                                                                                     | 2,3,S7,S8,S9            |
| DLY5131/5132 | <i>MATa cdc13-1int ade2-1 trp1-1 can1-100 leu2-3,112 his3-11,15 ura3 GAL+ psi+ ssd1-d2 RAD5 cdc15-2 bar1 rad9Δ::HIS3 exo1Δ::LEU2</i>                                                                                                      | 2,3,S7,S8,S9            |
| DLY5272/5273 | <i>MATa cdc13-1int ade2-1 trp1-1 can1-100 leu2-3,112 his3-11,15 ura3 GAL+ psi+ ssd1-d2 RAD5 cdc15-2 bar1 rad9Δ::HIS3 sgs1Δ::KanMX exo1Δ::LEU2</i>                                                                                         | 2,3,S7,S8,S9            |
| DDY337       | <i>MATa/Mata ade2-1/ade2-1 trp1-1/trp1-1 can1-100/can1-100 leu2-3,112/leu2-3,112 his3-11,15/his3-11,15 ura3/ura3 GAL+/GAL+ psi+/psi+ ssd1-d2/ssd1-d2 RAD5/RAD5 cdc13Δ::hphMX/CDC13 sgs1::KanMX/SGS1 exo1Δ::leu2/EXO1 rad9Δ::HIS3/RAD9</i> | 5,S10                   |
| DLY4721      | <i>MATa ade2-1 trp1-1 can1-100 leu2-3,112 his3-11,15 ura3 GAL+ psi+ ssd1-d2 RAD5 sgs1Δ::KanMX</i>                                                                                                                                         | S1                      |
| DLY1273      | <i>MATa ade2-1 trp1-1 can1-100 leu2-3,112 his3-11,15 ura3 GAL+ psi+ ssd1-d2 RAD5 exo1::LEU2</i>                                                                                                                                           | S1                      |
| DLY4915      | <i>MATa ade2-1 trp1-1 can1-100 leu2-3,112 his3-11,15 ura3 GAL+ psi+ ssd1-d2 RAD5 sgs1::KanMX exo1Δ::LEU2</i>                                                                                                                              | S1                      |
| DLY4724      | <i>MATa ade2-1 trp1-1 can1-100 leu2-3,112 his3-11,15 ura3 GAL+ psi+ ssd1-d2 RAD5 rad9Δ::HIS3 sgs1::KanMX</i>                                                                                                                              | S1                      |
| DLY1698      | <i>MATa ade2-1 trp1-1 can1-100 leu2-3,112 his3-11,15 ura3 GAL+ psi+ ssd1-d2 RAD5 rad9Δ::HIS3 exo1Δ::LEU2</i>                                                                                                                              | S1                      |
| DLY6189      | <i>MATa cdc13-1int ade2-1 trp1-1 can1-100 leu2-3,112 his3-11,15 ura3 GAL+ psi+ ssd1-d2 RAD5 sae2:TRP1</i>                                                                                                                                 | S5                      |
| DLY6190      | <i>MATa cdc13-1int ade2-1 trp1-1 can1-100 leu2-3,112 his3-11,15 ura3 GAL+ psi+ ssd1-d2 RAD5 sae2:TRP1 exo1Δ::LEU2</i>                                                                                                                     | S5                      |
| DLY6192      | <i>MATa cdc13-1int ade2-1 trp1-1 can1-100 leu2-3,112 his3-11,15 ura3 GAL+ psi+ ssd1-d2 RAD5 sae2:TRP1 rad9Δ::HIS3</i>                                                                                                                     | S5                      |
| DLY6194      | <i>MATa cdc13-1int ade2-1 trp1-1 can1-100 leu2-3,112 his3-11,15 ura3 GAL+ psi+ ssd1-d2 RAD5 sae2:TRP1 rad9Δ::HIS3 sgs1Δ::KanMX</i>                                                                                                        | S5                      |
| DLY6198      | <i>MATa cdc13-1int ade2-1 trp1-1 can1-100 leu2-3,112 his3-11,15 ura3 GAL+ psi+ ssd1-d2 RAD5 sae2:TRP1 rad9Δ::HIS3 exo1Δ::LEU2</i>                                                                                                         | S5                      |
| DLY6221      | <i>MATa cdc13-1int ade2-1 trp1-1 can1-100 leu2-3,112 his3-11,15 ura3 GAL+ psi+ ssd1-d2 RAD5 sae2:TRP1 sgs1Δ::KanMX</i>                                                                                                                    | S5                      |
| DLY5886/5887 | <i>MATa/α ade2-1 trp1-1 can1-100 leu2-3,112 his3-11,15 ura3 GAL+ psi+ ssd1-d2 RAD5 rad9Δ::HIS3 sgs1::KanMX exo1Δ::LEU2 rad52Δ::TRP1</i>                                                                                                   | S4                      |
| DLY5888/5889 | <i>MATa/α cdc13-1int ade2-1 trp1-1 can1-100 leu2-3,112 his3-11,15 ura3 GAL+ psi+ ssd1-d2 RAD5 rad9Δ::HIS3 sgs1::KanMX exo1Δ::LEU2 rad52Δ::TRP1</i>                                                                                        | S4                      |
